# Supplementary material for: Polymorphic segmental duplications at 8p23.1 challenge the determination of individual defensin gene repertoires and the assembly of a contiguous human reference sequence
Source: PubMed Central journal article supplement (PMC544879; doi:10.1186/1471-2164-5-92), 2004-12-10
Supplement: 1471-2164-5-92-S1.pdf [file 1471-2164-5-92-S1.pdf]

**Additional\_file\_1**

Accession numbers, libraries and clone names of all clones shown in main text, Fig. 1

| Number | GenBank accession no. | Library-Clone name   |
|--------|-----------------------|----------------------|
| 1      | AC018398              | RP11-16G12           |
| 2      | AF287957              | CTD-2541M15          |
| 3      | AF233439              | GS1-24F4,CTD-2629I16 |
| 4      | AF200455              | SCb-540n10           |
| 5      | AF238378              | SCb-561b17           |
| 6      | AF228730              | SCb-332a23,CTB-415D8 |
| 7      | AF215847              | CTB-415D8            |
| 8      | AC130339              | RP13-941O14          |
| 9      | AC130360              | RP11-287P18          |
| 10     | AC130367              | RP11-1322A13         |
| 11     | AC134395              | RP11-739E3           |
| 12     | AC134683              | RP11-1175L4          |
| 13     | AF285443              | SCb-449o20           |
| 14     | AF202031              | SCb-497j4            |
| 15     | AC134684              | RP11-1118M6          |
| 16     | AC084121              | RP11-623J22          |
| 17     | AC144950              | RP11-191L23          |
| 18     | AC130365              | RP11-1195F20         |
| 19     | AC131269              | RP11-416I21          |
| 20     | AC105233              | RP11-52B19           |
| 21     | AC068020              | RP11-556O5           |
| 22     | AC068353              | RP11-399J23          |
| 23     | AF298854              | SCb-207i3            |
| 24     | AF205406              | SCb-633e22           |
| 25     | AF314060              | GS-i2046             |
| 26     | AF314059              | SCb-540n10           |
| 27     | AF252831              | SCb-177k12           |
| 28     | AF189745              | SCb-324n11           |
| 29     | AF252830              | SCb-295j18           |
| 30     | AC148106              | RP11-65P161          |
| 31     | AC105214              | RP11-354G4           |
| 32     | AC092766              | RP11-483N3           |
