# Supplementary material for: Polymorphic segmental duplications at 8p23.1 challenge the determination of individual defensin gene repertoires and the assembly of a contiguous human reference sequence
Source: PubMed Central journal article supplement (PMC544879; doi:10.1186/1471-2164-5-92), 2004-12-10
Supplement: 1471-2164-5-92-S2.pdf [file 1471-2164-5-92-S2.pdf]

**Additional\_file\_2**

Synonymous and non synonymous changes by SNPs in human DEF genes and their ancestral alleles by comparison to chimpanzee sequences.

| Gene    | RefSeq    | Base Position | Human SNP entry | alleles | aa change | Chimp ancestral allele |
|---------|-----------|---------------|-----------------|---------|-----------|------------------------|
| DEFB107 | AY122467  | 13            | rs2246582       | G/T     | F5V       | T                      |
| DEFB105 | NM_152250 | 107           | rs2737995       | C/T     | P36L      | C                      |
| DEFB106 | NM_152251 | 125           | rs2293957       | C/T     |           | T                      |
| DEFB104 | NM_080389 | 42            | rs11774031      | G/A     | V10I      | A                      |
| DEFB4   | NM_004942 | 78            |                 | C/T     |           | C                      |
|         |           | 120           | rs2740090       | C/T     |           | T                      |
| DEFB108 | AF540980  | 97            | rs2739903       | G/A     | G33S      | G                      |
|         |           | 111           | rs2740647       | C/T     |           | C                      |
|         |           | 138           | rs2719547       | A/T     |           | T                      |
| DEFB1   | NM_005218 | 152           | rs1800957       | C/T     |           | C                      |
|         |           | 160           | rs1804747       | G/A     | H30R      | A                      |
|         |           | 182           | rs5743490       | C/T     |           | C                      |
|         |           | 183           | rs2738047       | G/A     | V38I      | G                      |
|         |           | 214           | rs1800967       | C/T     | A48V      | C                      |
|         |           | 270           | rs1800968       | A/T     | C67S      | T                      |
| DEFA4   | NM_001925 | 306           | rs2738100       | C/T     |           | T                      |
| DEFT1   | NM_139127 | 135           | rs1985038       | G/A     |           | A                      |
| DEFA5   | NM_021010 | 247           | rs2272719       | C/T     |           | C                      |
|         |           | 252           | rs7839771       | G/A     | R71H      | A                      |
