# Supplementary material for: Polymorphic segmental duplications at 8p23.1 challenge the determination of individual defensin gene repertoires and the assembly of a contiguous human reference sequence
Source: PubMed Central journal article supplement (PMC544879; doi:10.1186/1471-2164-5-92), 2004-12-10

Additional\_file\_4

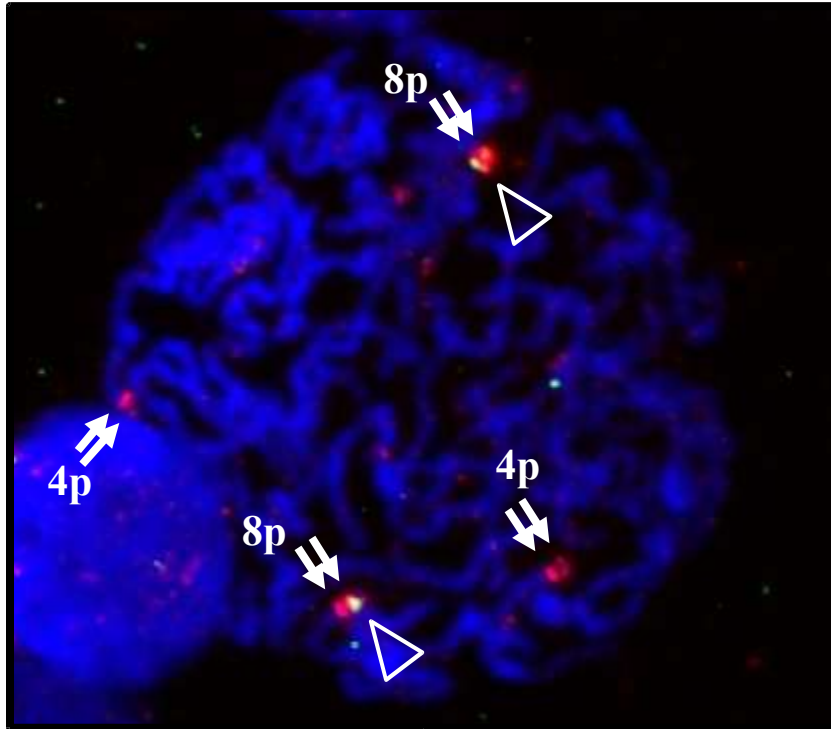

Supplement: 1471-2164-5-92-S4.pdf [file 1471-2164-5-92-S4.pdf]
